# Supplementary material
Source: PubMed Central journal article supplement (PMC7111210)
Supplement: NIHMS1546841-supplement-sup_fig1.pdf [file NIHMS1546841-supplement-sup_fig1.pdf]

Fig. 1a: Top panel. First stained for p100/p52 then stripped and reprobed for cIAP1 and then stripped and reprobed for  $\beta$ -actin. For p100, p52 and b-actin the molecular weight ladder was acquired in visible light and overlaid in red over the enhanced chemiluminescence (ECL) signal in green.

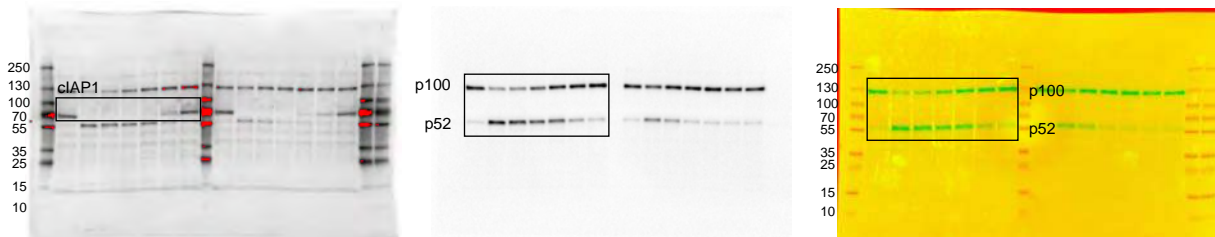

Fig. 1a: Middle panel. First stained for cIAP1 or cIAP2 then stripped and reprobed for  $\beta$ -actin. The molecular weight ladder was acquired in visible light and overlaid in red over the ECL signal in green.  $\beta$ -actin controls were not included in the figure but shown here.

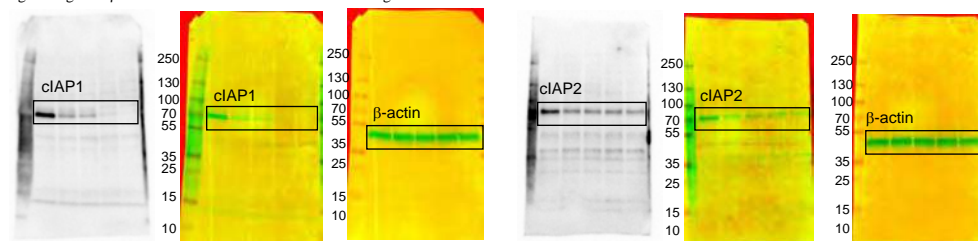

Fig. 1a: Bottom panel. First stained for p100 and p52, then stripped and reprobed for  $I\kappa B\alpha$ , then stripped and reprobed for  $\beta$ -actin. The molecular weight ladder was acquired in visible light and overlaid in red over the ECL signal in green.

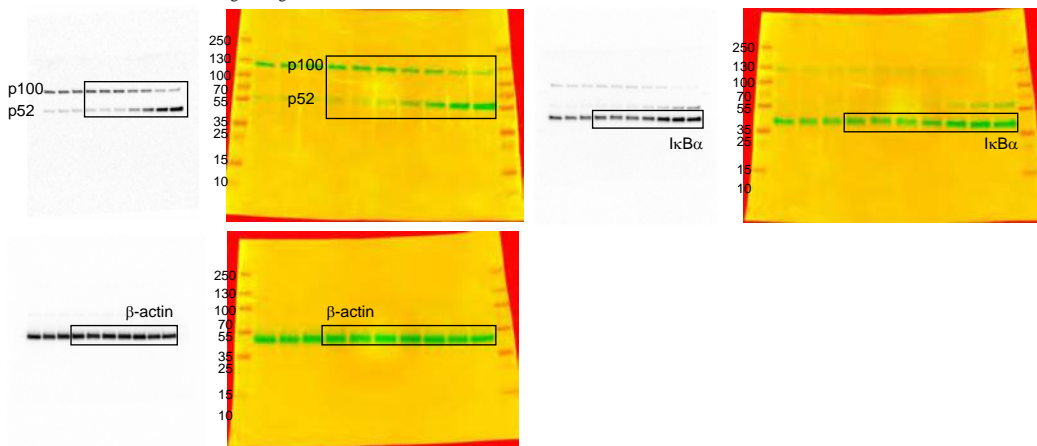

Extended Data Fig. 1a,b. First stained for p100/p52 then stripped and reprobed for cIAP1 and then stripped and reprobed for  $\beta$ -actin. The molecular weight ladder was acquired in visible light and overlaid in red over the ECL signal in green.

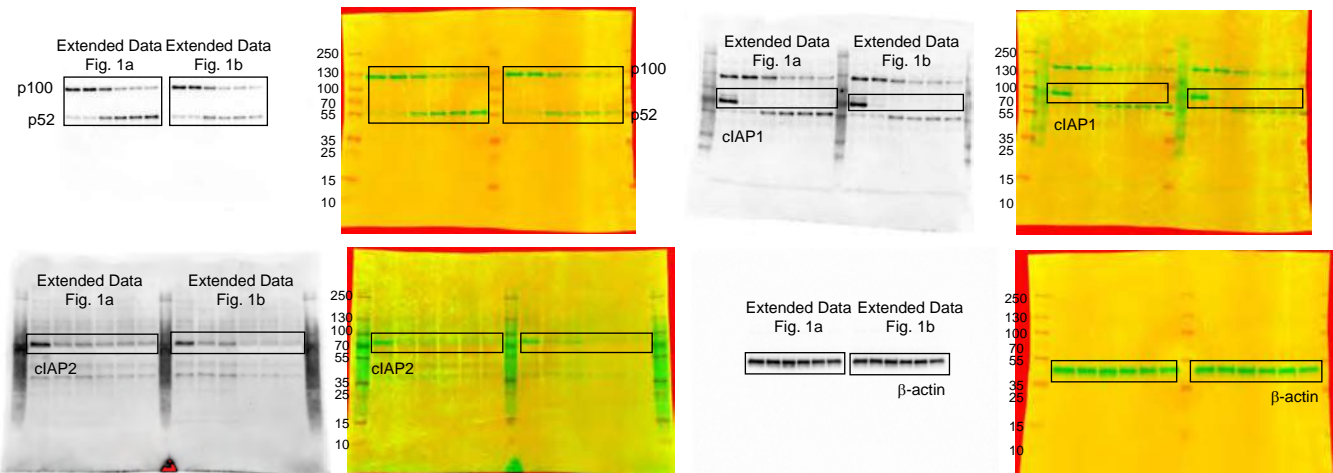

Extended Data Fig. 1c,d. First stained for p100/p52 then stripped and reprobed for cIAP1 and then stripped and reprobed for  $\beta$ -actin. The molecular weight ladder was acquired in visible light and overlaid in red over the ECL signal in green.

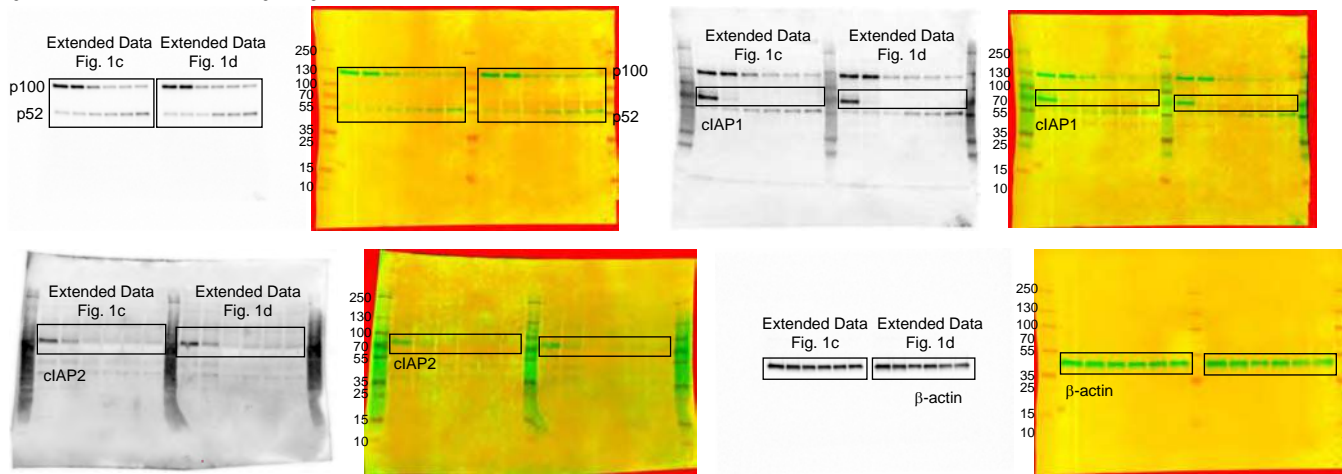

Extended Data Fig. 3a. The same membrane was acquired for different lengths of time to obtain optimal images of the target bands for each tissue. The cIAP1 blot was stripped and reprobed for  $\beta$ -actin. The molecular weight ladder was acquired in visible light and overlaid in red over the ECL signal in green.

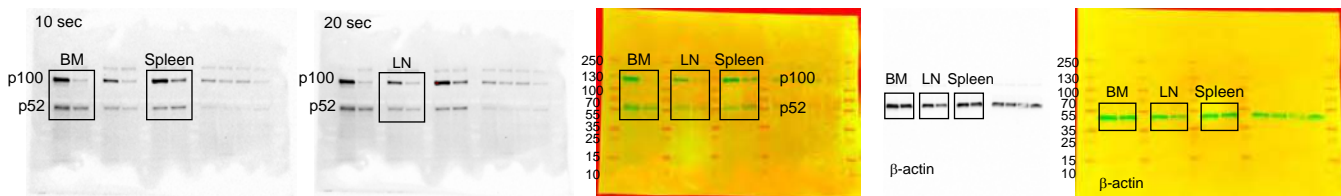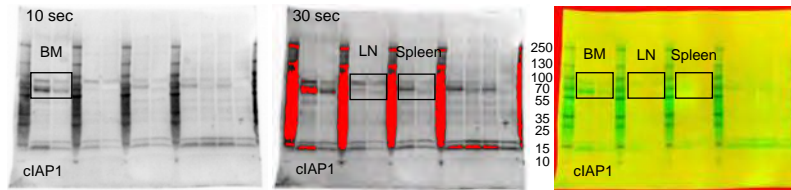

Extended Data Fig. 3b The same membrane was acquired for different lengths of time to obtain optimal images of the target bands for each tissue. The cIAP1 blot was stripped and reprobed for  $\beta$ -actin. The molecular weight ladder was acquired in visible light and overlaid in red over the ECL signal in green.

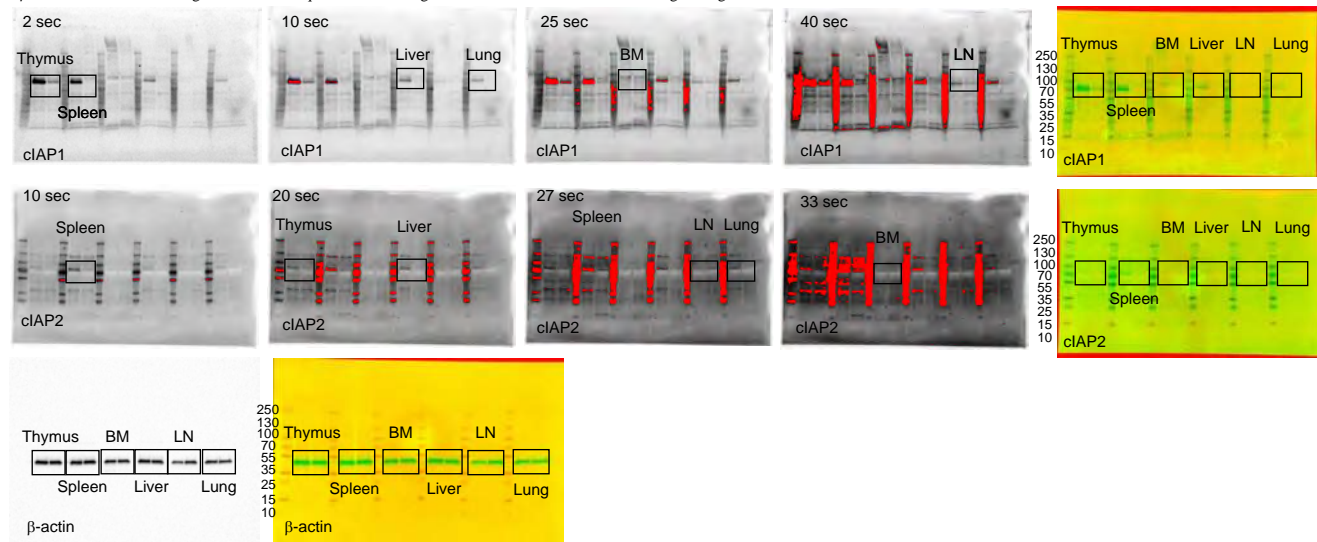

Extended Data Fig. 4c. First stained for p100/p52 then stripped and reprobed for cIAP1 and then stripped and reprobed for  $\beta$ -actin.

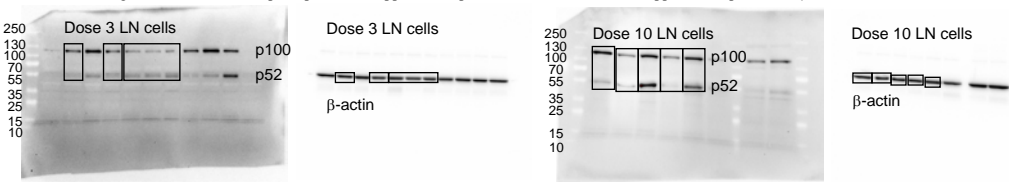

Extended Data Fig. 4d. First stained for p100/p52 then stripped and reprobed for cIAP1 and then stripped and reprobed for  $\beta$ -actin. The molecular weight ladder was acquired in visible light and overlaid in red over the ECL signal in green.

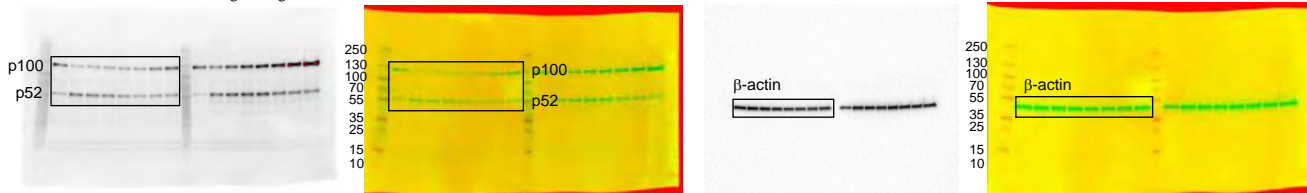

Extended Data Fig. 4f. First stained for p100/p52 then stripped and reprobed for cIAP1 and then stripped and reprobed for  $\beta$ -actin. The molecular weight ladder was acquired in visible light and overlaid in red over the ECL signal in green.

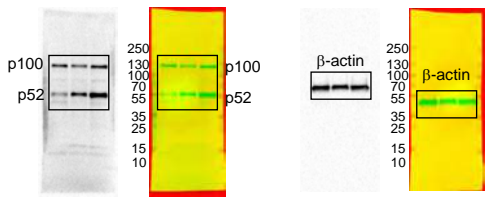

### Supplementary Figure 1: Uncropped gel scans
