# Supplementary material
Source: PubMed Central journal article supplement (PMC7111210)
Supplement: NIHMS1546841-supplement-sup_fig2.pdf [file NIHMS1546841-supplement-sup_fig2.pdf]

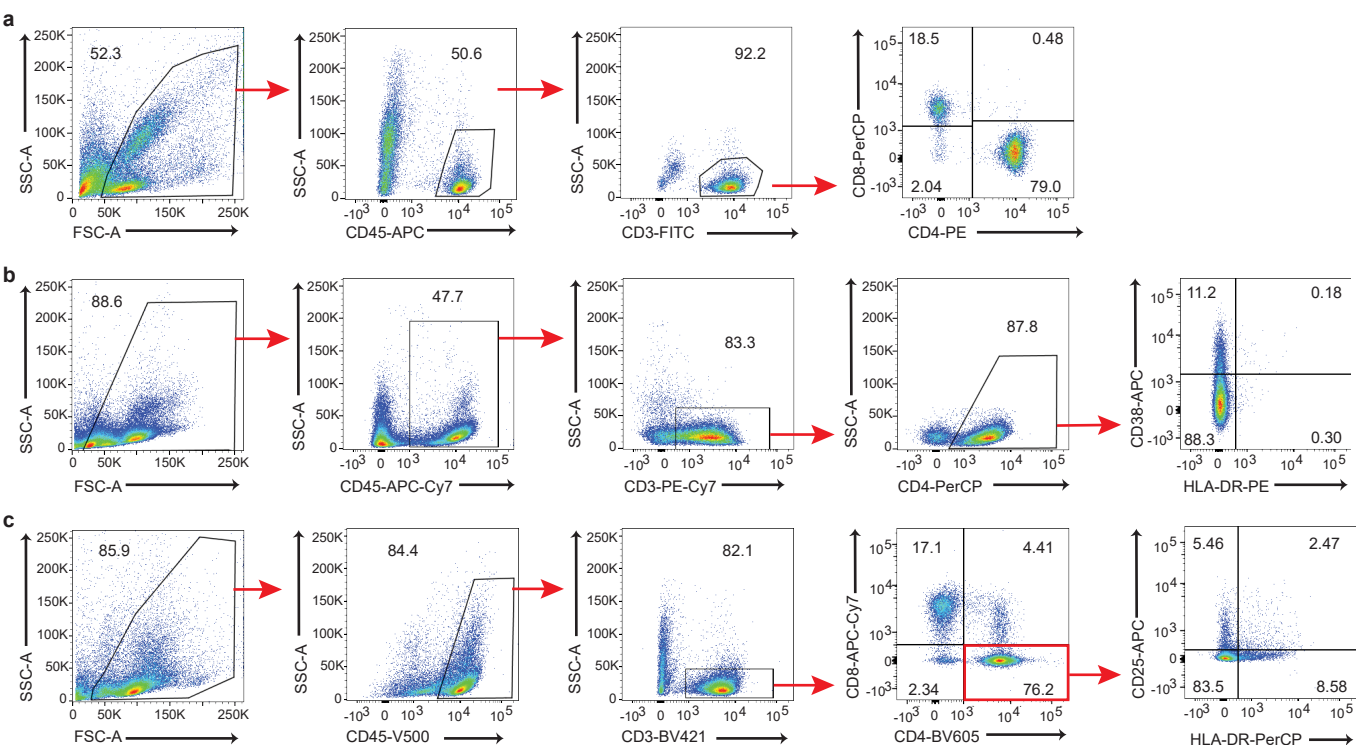

**Supplementary Figure 2: Flow cytometric gating strategies in BLT mice.** Gating strategies for the identification of (a) human CD4<sup>+</sup> and CD8<sup>+</sup> T cells, (b) activated (CD38<sup>+</sup>HLA-DR<sup>+</sup>) T cells, and (c) resting (CD25<sup>neg</sup> HLA-DR<sup>neg</sup>) CD4<sup>+</sup> T cells.
