# Supplementary material
Source: PubMed Central journal article supplement (PMC7111210)
Supplement: NIHMS1546841-supplement-Supplementary_Table_1-7.pdf [file NIHMS1546841-supplement-Supplementary_Table_1-7.pdf]

| Experiment | Treatment group | Mouse ID     | At time of HIV exposure       |                   |
|------------|-----------------|--------------|-------------------------------|-------------------|
|            |                 |              | Peripheral blood humanization |                   |
|            |                 |              | %CD45 <sup>+</sup>            | %CD4 <sup>+</sup> |
| #1         | Control vehicle | 1            | 57.4                          | 76.2              |
|            |                 | 2            | 40.8                          | 64.8              |
|            |                 | 3            | 49.7                          | 70.4              |
|            |                 | 4            | 51.8                          | 51.4              |
|            |                 | 5            | 54                            | 68                |
|            |                 | 6            | 54.7                          | 67.2              |
|            |                 | Mean ± s.e.m | 51.4% ± 2.4%                  | 66.3% ± 3.4%      |
|            | AZD5582         | 7            | 55.7                          | 77.5              |
|            |                 | 8            | 54.4                          | 68.5              |
|            |                 | 9            | 57.2                          | 76.9              |
|            |                 | 10           | 51.9                          | 70.8              |
|            |                 | 11           | 41.8                          | 73.1              |
| 12         |                 | 47.9         | 50.4                          |                   |
|            | Mean ± s.e.m    | 51.5% ± 2.3% | 69.5% ± 4.1%                  |                   |
| #2         | Control vehicle | 13           | 72.5                          | 88.1              |
|            |                 | 14           | 49.1                          | 90.1              |
|            |                 | 15           | 41.3                          | 86.1              |
|            |                 | 16           | 31.3                          | 74.0              |
|            |                 | Mean ± s.e.m | 48.6% ± 8.8%                  | 84.6% ± 3.62%     |
|            | AZD5582         | 17           | 74.9                          | 72.8              |
|            |                 | 18           | 42.2                          | 79.5              |
|            |                 | 19           | 38.3                          | 78.6              |
|            |                 | 20           | 37.2                          | 82.8              |
|            |                 | Mean ± s.e.m | 48.15 ± 10%                   | 78.43 ± 2.1%      |

**Supplementary Table 1: Levels of human cells in BLT mice at the time of HIV-1<sub>JR-CSF</sub>**

**exposure as determined by flow cytometry analysis of peripheral blood.** BLT mice in

experiment 1 are shown in Fig. 2b,c left panels and BLT mice in experiment 2 are shown in Fig.

2b,c right panels. s.e.m: standard error mean. Gating strategy=Live→human CD45

(%CD45<sup>+</sup>)→human CD3→human CD4 (%CD4<sup>+</sup>).

| Experiment | Treatment group | Mouse ID | Viral load (copies/mL plasma) |       |       |
|------------|-----------------|----------|-------------------------------|-------|-------|
|            |                 |          | 0 h                           | 24 h  | 48 h  |
| #1         | Control vehicle | 1        | < LOQ                         | < LOQ | < LOQ |
|            |                 | 2        | < LOQ                         | < LOQ | < LOQ |
|            |                 | 3        | < LOQ                         | < LOQ | < LOQ |
|            |                 | 4        | < LOQ                         | < LOQ | < LOQ |
|            |                 | 5        | < LOQ                         | < LOQ | < LOQ |
|            |                 | 6        | < LOQ                         | < LOQ | < LOQ |
|            | AZD5582         | 7        | < LOQ                         | < LOQ | < LOQ |
|            |                 | 8        | < LOQ                         | < LOQ | < LOQ |
|            |                 | 9        | < LOQ                         | < LOQ | < LOQ |
|            |                 | 10       | < LOQ                         | < LOQ | 553   |
|            |                 | 11       | < LOQ                         | < LOQ | 773   |
|            |                 | 12       | < LOQ                         | < LOQ | 876   |
| #2         | Control vehicle | 13       | < LOQ                         | < LOQ | < LOQ |
|            |                 | 14       | < LOQ                         | < LOQ | < LOQ |
|            |                 | 15       | < LOQ                         | < LOQ | < LOQ |
|            |                 | 16       | < LOQ                         | < LOQ | < LOQ |
|            | AZD5582         | 17       | < LOQ                         | < LOQ | < LOQ |
|            |                 | 18       | < LOQ                         | < LOQ | 573   |
|            |                 | 19       | < LOQ                         | < LOQ | 953   |
|            |                 | 20       | < LOQ                         | < LOQ | 1,574 |

**Supplementary Table 2: Detectable plasma viremia in HIV-infected, ART-suppressed BLT mice following a single dose of AZD5582 (3 mg/kg).** The limit of quantification (LOQ) for this assay is 350 copies/mL.

| Treatment group | Tissue          | Copies HIV-DNA/<br>10 <sup>5</sup> resting CD4+ T cells | Fold difference between<br>control and AZD5582 |
|-----------------|-----------------|---------------------------------------------------------|------------------------------------------------|
| Control vehicle | Lung            | 369.303                                                 | 1.3                                            |
|                 | Bone marrow     | 49.988                                                  | -0.59                                          |
|                 | Thymic organoid | 17.58                                                   | -1.56                                          |
| AZD5582         | Lung            | 272.822                                                 |                                                |
|                 | Bone marrow     | 84.33                                                   |                                                |
|                 | Thymic organoid | 27.43                                                   |                                                |

**Supplementary Table 3: Cell-associated HIV-DNA levels in the tissues of ART-suppressed BLT mice following a single dose of AZD5582 (3 mg/kg).**

| Analyte                    | Serum concentration |              |               | Comparison of serum concentrations |            |             |
|----------------------------|---------------------|--------------|---------------|------------------------------------|------------|-------------|
|                            | 0 h                 | 24 h         | 5 d           | 0 h vs 24 h                        | 0 h vs 5 d | 24 h vs 5 d |
| Albumin                    | 3.2 ± 0.18          | 3.85 ± 0.55  | 2.63 ± 0.10   | p=0.5000                           | p=0.1250   | p=0.2500    |
| Alkaline phosphatase       | 61.33 ± 30.02       | 58.5 ± 3.1   | 17.75 ± 3.17  | p=0.7500                           | p=0.5000   | p=0.1250    |
| Alanine aminotransferase   | 118.50 ± 57.40      | 702 ± 170.71 | 33.50 ± 12.87 | p=0.1250                           | p=0.2500   | p=0.1250    |
| Amylase                    | 593.50 ± 21.85      | 607 ± 38.54  | 397 ± 101.04  | p>0.9999                           | p=0.2500   | p=0.2500    |
| Aspartate aminotransferase | 235.67 ± 106.18     | 709 ± 216.11 | 92 ± 10.03    | p=0.2500                           | p=0.2500   | p=0.1250    |
| Blood urea nitrogen        | 23 ± 1.78           | 11.5 ± 0.96  | 15 ± 1        | p=0.1250                           | p=0.1250   | p=0.2500    |
| Calcium                    | 6.38 ± 1.57         | 10.75 ± 0.22 | 11.7 ± 0.26   | p=0.2500                           | p=0.1250   | p=0.2500    |
| Creatinine                 | 0.29 ± 0.06         | 0.11 ± 0.02  | 0.46 ± 0.04   | p=0.1250                           | p=0.2500   | p=0.1250    |
| Phosphorus                 | 4.45 ± 1.4          | 5.45 ± 0.25  | 4.90 ± 0.44   | p>0.9999                           | p=0.8750   | p=0.3750    |
| Total bilirubin            | 2.15 ± 0.95         | 1.15 ± 0.22  | 0.80 ± 0.14   | p=0.5000                           | p=0.2500   | p=0.3750    |
| Total protein              | 5.27 ± 0.24         | 5.90 ± 0.97  | 6.45 ± 0.33   | p>0.9999                           | p=0.2500   | p=0.8750    |

**Supplementary Table 4: Levels of serum indicators for organ drug toxicity.** Serum was collected from BALB/c mice (n=4) immediately prior to, 24 h after, and five days after administration of a single dose of AZD5582. Shown are the mean concentrations ( $\pm$  standard error mean) of serum albumin (g/dL), alkaline phosphatase (U/L), alanine aminotransferase (U/L), amylase (U/L), aspartate aminotransferase (U/L), blood urea nitrogen (mg/dL), calcium (mg/dL), creatinine (mg/dL), phosphorus (mg/dL), total bilirubin (mg/dL) and total protein (g/dL). A two-sided Wilcoxon matched-pairs signed ranks T test was used to evaluate statistical significance.

|                               | Tissue          | Treatment group |             | p value |
|-------------------------------|-----------------|-----------------|-------------|---------|
|                               |                 | Control vehicle | AZD5582     |         |
| %CD38+HLA-DR+ of CD4+ T cells | Bone marrow     | 0.85 ± 0.35     | 1.15 ± 0.68 | 0.8593  |
|                               | Thymic organoid | 2.7 ± 1.13      | 2.78 ± 1.03 | 0.6991  |
|                               | Lymph nodes     | 1.23 ± 0.50     | 1.40 ± 0.57 | 0.9372  |
|                               | Spleen          | 0.71 ± 0.31     | 0.63 ± 0.21 | 0.8593  |
|                               | Liver           | 1.08 ± 0.38     | 1.04 ± 0.36 | 0.8939  |
|                               | Lung            | 0.56 ± 0.23     | 0.89 ± 0.40 | 0.8139  |
| %CD38+HLA-DR+ of CD8+ T cells | Bone marrow     | 1.8 ± 0.43      | 1.69 ± 0.99 | 0.3874  |
|                               | Thymic organoid | 0.30 ± 0.11     | 0.23 ± 0.08 | 0.8030  |
|                               | Lymph nodes     | 0.35 ± 0.25     | 0.53 ± 0.24 | 0.6991  |
|                               | Spleen          | 1.87 ± 0.50     | 0.62 ± 0.36 | 0.0260  |
|                               | Liver           | 0.23 ± 0.08     | 0.34 ± 0.21 | 0.4827  |
|                               | Lung            | 0.35 ± 0.19     | 0.86 ± 0.47 | 0.4177  |

**Supplementary Table 5: AZD5582 does not activate T cells in the tissues of HIV-infected, ART-suppressed BLT mice.** Shown is the mean percentage ( $\pm$  standard error mean) of CD4<sup>+</sup> and CD8<sup>+</sup> T cells co-expressing CD38 and HLA-DR from the bone marrow, thymic organoid, lymph nodes, spleen, liver and lung of HIV-infected, ART-suppressed BLT mice (n=6/group) 24 h after treatment with control vehicle or AZD5582. A two-sided Mann-Whitney test was used to evaluate statistical significance.

| Cytokine/chemokine | Control (pg/mL) | AZD5582 (pg/mL) | Difference between means | p value |
|--------------------|-----------------|-----------------|--------------------------|---------|
| EGF                | < LOQ           | < LOQ           | NA                       | NA      |
| FGF-2              | 616.1 ± 192     | 626.6 ± 218     | 10.5 ± 26                | 0.7835  |
| Eotaxin            | < LOQ           | < LOQ           | NA                       | NA      |
| TGFα               | < LOQ           | < LOQ           | NA                       | NA      |
| G-CSF              | < LOQ           | < LOQ           | NA                       | NA      |
| Flt-3L             | 3.205 ± 1.605   | < LOQ           | NA                       | NA      |
| GM-CSF             | 34.53 ± 16.31   | 32.30 ± 16.1    | -2.23 ± 0.21             | 0.9221  |
| Fractalkine        | 26.82 ± 25.22   | 18.67 ± 17.07   | -8.15 ± 8.15             | >0.9999 |
| IFNα2              | 6.038 ± 3.193   | 4.069 ± 2.469   | -1.969 ± 0.724           | 0.7273  |
| IFNγ               | 130.1 ± 41.68   | 130.1 ± 41.34   | 0 ± 0.34                 | >0.9999 |
| GRO                | 55.12 ± 18.23   | 68.16 ± 19.85   | 13.04 ± 1.62             | 0.6234  |
| IL-10              | 40.39 ± 11.51   | 40.37 ± 11.05   | -0.02 ± 0.46             | 0.9372  |
| MCP-3              | < LOQ           | < LOQ           | NA                       | NA      |
| IL-12p40           | 21.64 ± 6.422   | 22.23 ± 9.533   | 0.59 ± 3.111             | 0.974   |
| MDC                | 166.6 ± 12.84   | 145.9 ± 16.25   | -20.73 ± 3.41            | 0.3939  |
| IL-12p70           | < LOQ           | < LOQ           | NA                       | NA      |
| PDGF-AA            | 1,325 ± 505.5   | 1,303 ± 463.8   | -22 ± 41.70              | >0.9999 |
| IL-13              | 4.649 ± 2.096   | 5.444 ± 2.569   | 0.795 ± 0.473            | 0.8485  |
| PDGF-AB/BB         | 201 ± 32.67     | 169.7 ± 36.58   | -31.30 ± 3.91            | 0.4848  |
| IL-15              | 2.825 ± 1.225   | < LOQ           | NA                       | NA      |
| sCD40L             | 65.34 ± 8.32    | 63.31 ± 9.24    | -2.03 ± 0.92             | >0.9999 |
| IL-17A             | 15.32 ± 4.241   | 14.75 ± 4.141   | -0.57 ± 0.100            | 0.9372  |
| IL-1RA             | 2.170 ± 0.5698  | 3.619 ± 2.019   | 1.449 ± 1.4492           | >0.9999 |
| IL-1α              | 33.93 ± 15.72   | 38.85 ± 21      | 4.92 ± 5.280             | 0.8139  |
| IL-9               | < LOQ           | < LOQ           | NA                       | NA      |
| IL-1β              | < LOQ           | < LOQ           | NA                       | NA      |
| IL-2               | 1.907 ± 0.3074  | 2.066 ± 0.4656  | 0.159 ± 0.1582           | >0.9999 |
| IL-3               | < LOQ           | < LOQ           | NA                       | NA      |
| IL-4               | 24.58 ± 9.935   | 24.64 ± 8.402   | 0.06 ± 1.533             | 0.8939  |
| IL-5               | 10.10 ± 7.984   | 9.210 ± 7.268   | -0.8900 ± 0.716          | 0.8485  |
| IL-6               | 9.847 ± 5.244   | 10.43 ± 5.650   | 0.5830 ± 0.4060          | 0.8485  |
| IL-7               | < LOQ           | < LOQ           | NA                       | NA      |
| IL-8               | 60.04 ± 27.66   | 66.50 ± 31.76   | 6.46 ± 4.1               | 0.7381  |
| IP-10              | 1,071 ± 448.9   | 1,076 ± 434.3   | 5.000 ± 14.60            | >0.9999 |
| MCP-1              | 461.5 ± 114.8   | 465.4 ± 120.3   | 3.9 ± 5.500              | >0.9999 |
| MIP-1α             | < LOQ           | < LOQ           | NA                       | NA      |
| MIP-1β             | 9.593 ± 3.152   | 10.22 ± 3.037   | 0.6270 ± 0.1150          | 0.7792  |
| RANTES             | 840.3 ± 364.8   | 764.3 ± 329.8   | -76 ± 35.00              | 0.5887  |
| TNFα               | 21.41 ± 10.45   | 22.6 ± 9.11     | 1.190 ± 1.340            | 0.9805  |
| TNFβ               | < LOQ           | < LOQ           | NA                       | NA      |
| VEGF               | 9.014 ± 7.414   | 9.655 ± 5.33    | 0.641 ± 2.084            | 0.5455  |

**Supplementary Table 6: Plasma cytokine analysis from mice treated with vehicle control or AZD5582.** BLT mice were administered vehicle control (n=6) or AZD5582 (n=6) and peripheral blood plasma collected 24 h later to analyze the levels of 41 human cytokines/chemokines that are commonly associated with cell activation. Shown is the mean concentration (pg/mL) ± standard error mean of each cytokine/chemokine analyzed, the difference between the mean concentrations of each cytokine/chemokine between groups and the corresponding p value as

determined with a two-sided Mann-Whitney U test. Assay range:  $3.2-1 \times 10^4$  pg/mL. LOQ: limit of quantification. NA: not applicable. For statistical analysis, values <LOQ were set at 1.6 pg/ml.

| RM ID | Group   | Sex    | Date of birth | Age at first dose (years) |
|-------|---------|--------|---------------|---------------------------|
| RDm16 | AZD5582 | Male   | 4/19/2014     | 3.8                       |
| RDl16 | AZD5582 | Male   | 4/12/2014     | 3.8                       |
| RKn16 | AZD5582 | Male   | 4/26/2014     | 3.8                       |
| RFk16 | AZD5582 | Male   | 4/08/2014     | 3.8                       |
| RNp16 | AZD5582 | Male   | 4/08/2014     | 3.8                       |
| RLu16 | AZD5582 | Male   | 6/10/2014     | 3.6                       |
| RQs16 | AZD5582 | Male   | 5/28/2014     | 4.0                       |
| RAr16 | AZD5582 | Male   | 5/17/2014     | 4.0                       |
| RKp16 | AZD5582 | Male   | 5/06/2014     | 4.1                       |
| RLy15 | AZD5582 | Male   | 5/02/2013     | 5.1                       |
| RKl16 | AZD5582 | Male   | 4/14/2014     | 4.1                       |
| RYs16 | AZD5582 | Male   | 5/30/2014     | 4.0                       |
| RAj16 | Control | Male   | 3/29/2014     | 3.9                       |
| RDF16 | Control | Male   | 6/27/2013     | 4.6                       |
| RNq16 | Control | Male   | 5/15/2014     | 3.8                       |
| RQd16 | Control | Male   | 6/11/2013     | 4.7                       |
| RFv15 | Control | Male   | 4/20/2013     | 5.2                       |
| RKw16 | Control | Male   | 7/07/2014     | 3.9                       |
| RUl16 | Control | Male   | 5/29/2014     | 4.0                       |
| RKz15 | Control | Male   | 5/06/2013     | 5.1                       |
| RZe15 | Control | Female | 4/22/2012     | 6.2                       |

**Supplementary Table 7: Sex and age of AZD5582-treated and control SIV-infected, ART-suppressed RMs.**
